# Supplementary material
Source: PubMed Central journal article supplement (PMC2973925)
Supplement: 1007558107_pnas.201007558SI.pdf [file 1007558107_pnas.201007558SI.pdf]

# Supporting Information

Browne et al. 10.1073/pnas.1007558107

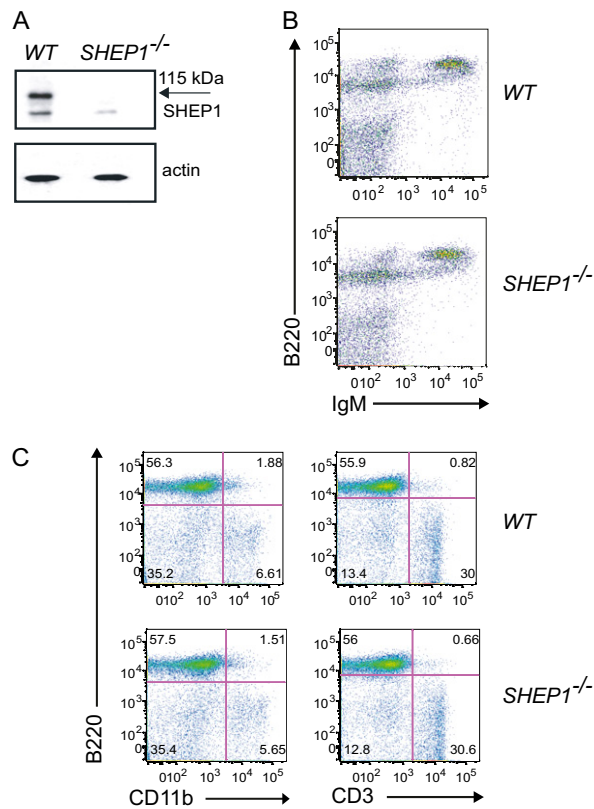

**Fig. S1.** B cells express SHEP1; *SHEP1*<sup>-/-</sup> mice have normal bone marrow B-cell compartments. (A) Splenic B cells from WT and *SHEP1*<sup>-/-</sup> mice were purified, lysed, and immunoblotted with antibodies that recognize the SH2 domain of SHEP1 or actin. (B) Bone marrow B cells from WT and *SHEP1*<sup>-/-</sup> mice were isolated and stained for B220 and IgM. Mature, B220<sup>hi</sup>, IgM<sup>+</sup>; immature, B220<sup>med</sup>, IgM<sup>+</sup>; pre/pro-B, B220<sup>med</sup>, IgM<sup>-</sup>. (C) Splenic cells from WT and *SHEP1*<sup>-/-</sup> mice were isolated and stained for B220, CD3 and CD11b. B, T, and myeloid cells were analyzed by flow cytometry.

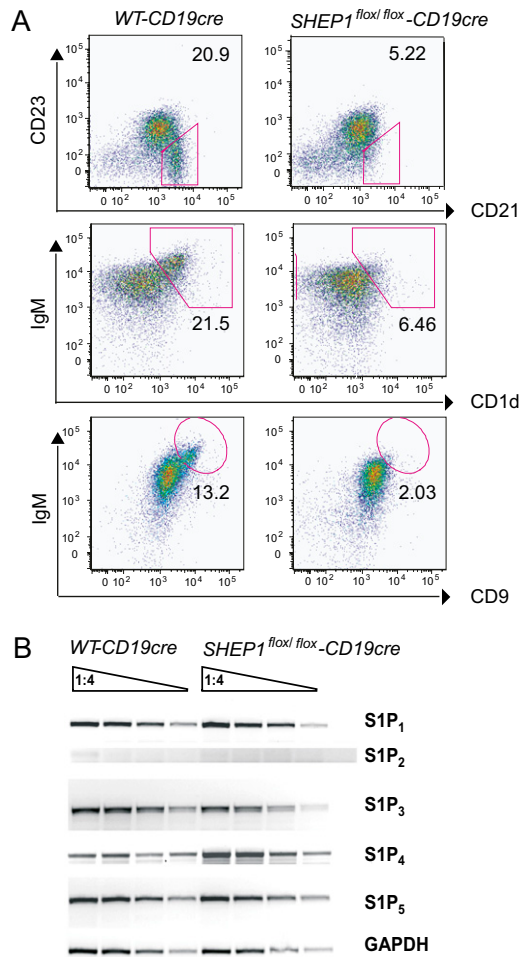

**Fig. 52.** Marginal zone B-cell compartment is reduced in *SHEP1<sup>flox/flox</sup>-CD19cre* as analyzed by staining for other surface markers. (A) WT-*CD19cre* and *SHEP1<sup>flox/flox</sup>-CD19cre* splenic B cells were stained for CD23, CD21, IgM, CD1d, and CD9. Frequencies of MZ B cells (IgM<sup>hi</sup>, CD1d<sup>hi</sup> or IgM<sup>hi</sup>, CD9<sup>hi</sup>) are shown. (B) WT-*CD19cre* and *SHEP1<sup>flox/flox</sup>-CD19cre* splenic B cells were purified. The levels of S1P receptor transcripts were determined by RT-PCR on 1:4 serially diluted cDNA.

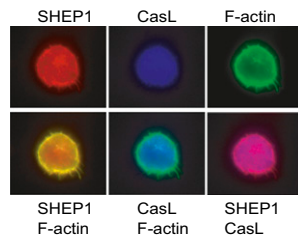

**Fig. 53.** Subcellular localization of SHEP1 and CasL. BAL17 cells were plated on VCAM-coated slides overnight, fixed, permeabilized, and stained with phalloidin, anti-SHEP1, and anti-CasL and analyzed by fluorescence microscopy. SHEP1 (red), F-actin (green); CasL (blue).

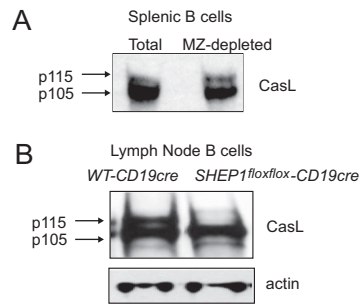

**Fig. S4.** CasL expression in MZB-depleted splenic B cells and in lymph node B cells. (A) WT-CD19cre splenic B cells were purified and depleted of CD9<sup>+</sup> cells. Total and CD9-depleted cells were lysed and immunoblotted with CasL antibodies. (B) Lymph node B cells from WT-CD19cre and SHEP1<sup>flx/flx</sup>-CD19cre mice were purified, lysed, and immunoblotted with CasL and actin antibodies.

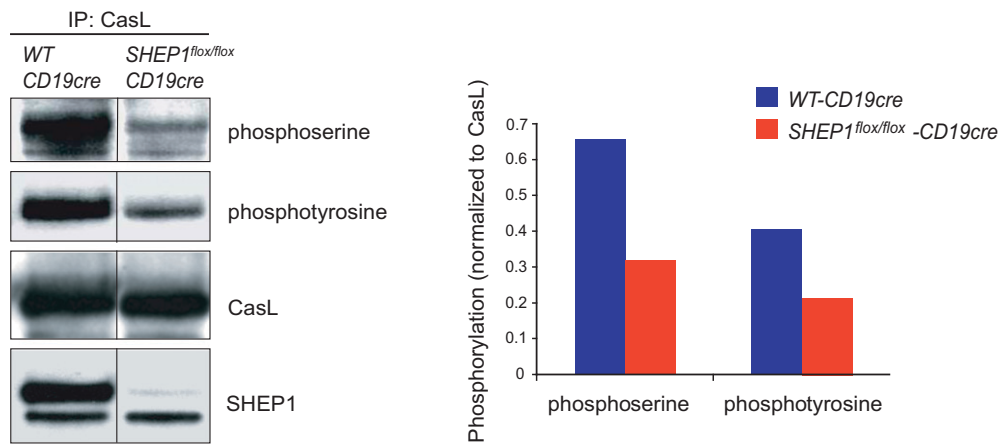

**Fig. S5.** Serine and tyrosine phosphorylation of CasL are reduced in SHEP1-deficient B cells. Purified splenic B cells from WT-CD19cre and SHEP1<sup>flx/flx</sup>-CD19cre mice were lysed, immunoprecipitated with anti-CasL, and immunoblotted for phosphoserine, phosphotyrosine, CasL, and SHEP1 (Left). Phosphoserine and phosphotyrosine bands were quantified by densitometry and normalized against total CasL. Normalized CasL phosphorylation is depicted in the bar graph (Right).

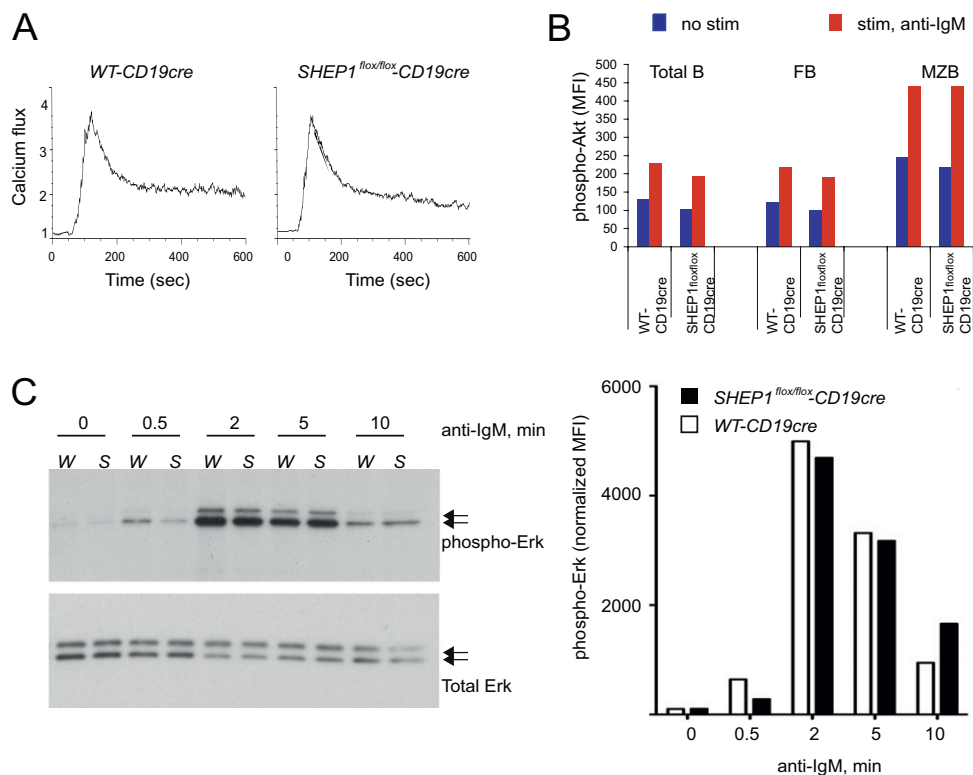

**Fig. S6.** SHEP1-deficient B cells can mobilize calcium and activate Akt downstream of BCR stimulation. (A) Purified splenic B cells were loaded with Fluo-4 and Fura Red and stimulated with 10  $\mu\text{g}/\text{mL}$  anti-IgM F(ab')<sub>2</sub>. Calcium flux was measured by flow cytometry. (B) Purified splenic B cells were stimulated with 10  $\mu\text{g}/\text{mL}$  anti-IgM F(ab')<sub>2</sub>, fixed, permeabilized, and stained for phospho-Akt, B220, CD21 and CD23. Mean fluorescence intensities are shown for total, follicular, and marginal zone B cells. (C) Purified splenic B cells were stimulated with 10  $\mu\text{g}/\text{mL}$  anti-IgM F(ab')<sub>2</sub>. B-cell lysates were lysed and immunoblotted for phospho-Erk and total Erk (Left; W, WT-CD19cre; S, SHEP1<sup>flox/flox</sup>-CD19cre). Erk phosphorylation was quantified by densitometry and depicted in the bar graph (Right).

**Table S1. RT-PCR, genotyping, cloning, and mutagenesis primers**

|                                   |                                                                                                                                                                  |
|-----------------------------------|------------------------------------------------------------------------------------------------------------------------------------------------------------------|
| Cloning of SHEP1*                 | Forward 5'-CCA CAT GCT AGC AAA CCA GAG<br>Reverse 5'-ATC TCC GGG GTC ACA GCT CGC                                                                                 |
| Mutagenesis of SHEP1 <sup>†</sup> | Forward 5'-ACC ACG GGG GCC TCG AAC ACA CCA ACG CTG<br>Reverse 5'-CAG CGT TGG TGT GTT CGA GGC CCC CGT GGT                                                         |
| Genotyping of SHEP1 <sup>‡</sup>  | Forward 5'-AAC AGG TCA GCC AGA TCC CCA CTT<br>Reverse (wt allele) 5'-TTC TAG TCA CCT CCC TCC CTC AAT<br>Reverse (floxed allele) 5'-TGC TTC CTC TTG CAA AAC CAC A |
| S1P <sub>1</sub> <sup>§</sup>     | Forward 5'-GTG TAG ACC CAG AGT CCT GCG<br>Reverse 5'-AGT ACA TGG GCC GGT GGA ACT                                                                                 |
| S1P <sub>2</sub> <sup>§</sup>     | Forward 5'-GGC CTA GCC AGT GCT CAG C<br>Reverse 5'-CCT TGG TGT AAT TGT AGT GTT CCA GA                                                                            |
| S1P <sub>3</sub> <sup>§</sup>     | Forward 5'-CCG GGT GCT GAG CAA GGT GG<br>Reverse 5'-CAG CCC AGG ATT GGC AGG GC                                                                                   |
| S1P <sub>4</sub> <sup>§</sup>     | Forward 5'-GCA AGC CCC GGG TTC CTT CC<br>Reverse 5'-CCA CAG CTC CCT GCC ACA GC                                                                                   |
| S1P <sub>5</sub> <sup>§</sup>     | Forward 5'-GGC GCA AGG GCC TCG AAC TT<br>Reverse 5'-ACG CGC AAA CCA AAG CGC AG                                                                                   |

\*SHEP1 was cloned from cDNA; accession no. AF168364.

<sup>†</sup>Y787E mutation of SHEP1 was introduced by using QuikChange Lightning Site Directed Mutagenesis Kit (Stratagene).

<sup>‡</sup>PCR primer.

<sup>§</sup>RT-PCR primer.
